# Supplementary material for: A new galling insect model enhances photosynthetic activity in an obligate holoparasitic plant
Source: PubMed Central journal article supplement (PMC8217554; doi:10.1038/s41598-021-92417-3), 2021-06-21
Supplement: 41598_2021_92417_MOESM1_ESM.pdf [file 41598_2021_92417_MOESM1_ESM.pdf]

# Supplementary Material for:

## **A new galling insect model enhances photosynthetic activity in an obligate holoparasitic plant**

Ryo Murakami<sup>a</sup>, Ryo Ushima<sup>a</sup>, Ryoma Sugimoto<sup>a</sup>, Daisuke Tamaoki<sup>b</sup>, Ichirou Karahara<sup>b</sup>, Yuko Hanba<sup>c</sup>, Tatsuya Wakasugi<sup>b</sup>, and Tsutomu Tsuchida<sup>b\*</sup>

<sup>a</sup> Graduate School of Science and Engineering for Education, University of Toyama, Toyama City, Toyama 930-8555, Japan

<sup>b</sup> Faculty of Science, Academic Assembly, University of Toyama, 3190 Gofuku, Toyama City, Toyama 930-8555, Japan

<sup>c</sup> Faculty of Applied Biology, Kyoto Institute of Technology, Matsugasaki, Sakyo-ku, Kyoto 606-8585, Japan

\*Corresponding author:

Tsutomu Tsuchida

[tsuchida@sci.u-toyama.ac.jp](mailto:tsuchida@sci.u-toyama.ac.jp)

+81-76-445-6553

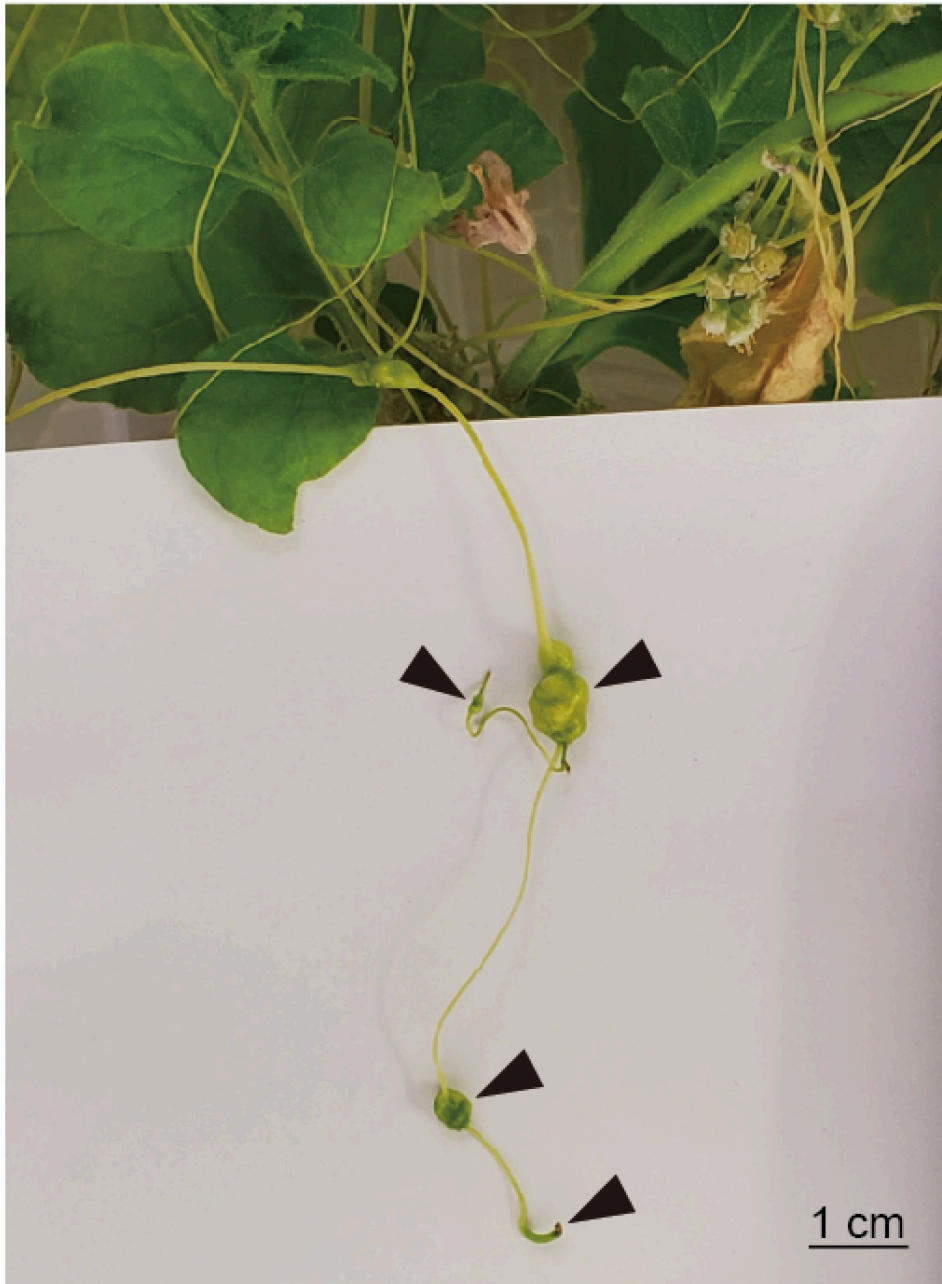

**Fig. S1** Galls of *Smicronyx madaranus* formed in the nodes of *Cuscuta campestris* in the laboratory. Arrow head, gall.

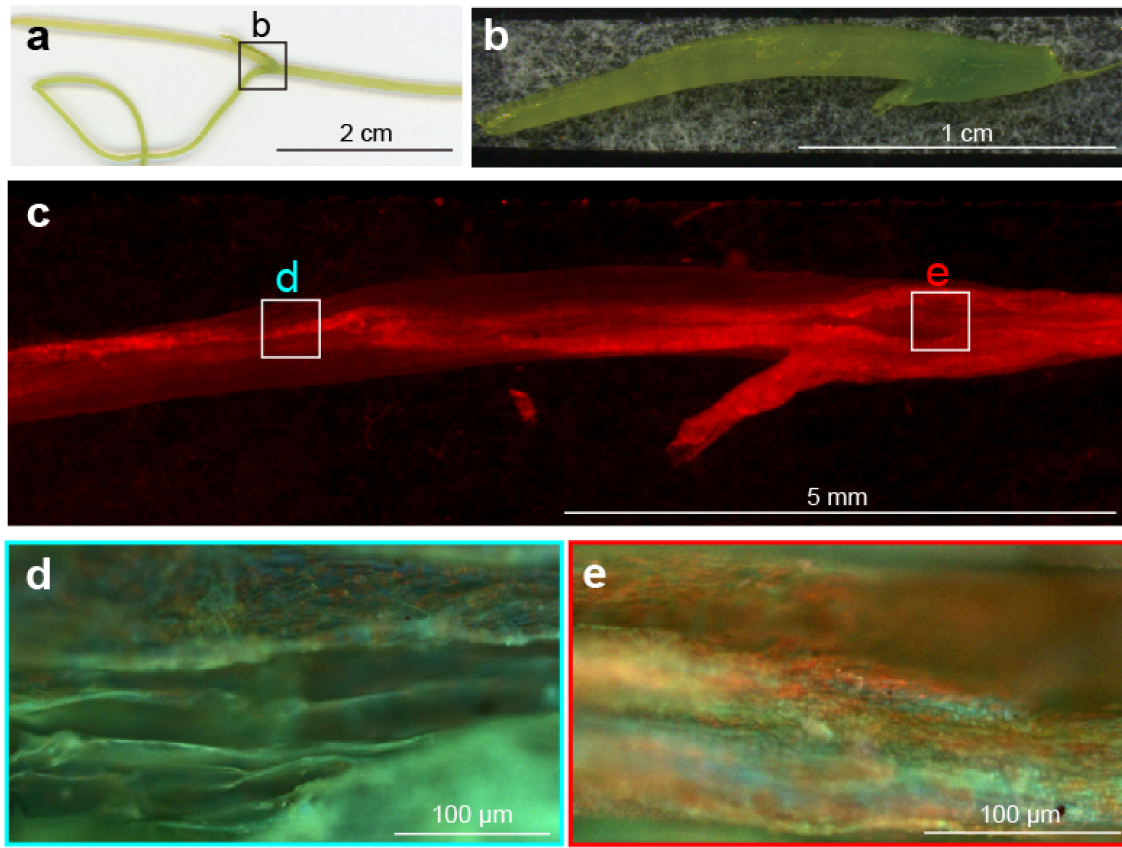

**Fig. S2** Distribution of chlorophylls and chloroplasts in the shoot of *Cuscuta campestris*. (a) Shoots of *C. campestris*, and (b) sagittal section of the branching point that corresponds to b in panel a. (c-e) autofluorescence of chlorophylls (red) and lignin (green), (d) and (e) magnified images of the points in shoot and the branching point in panel c.

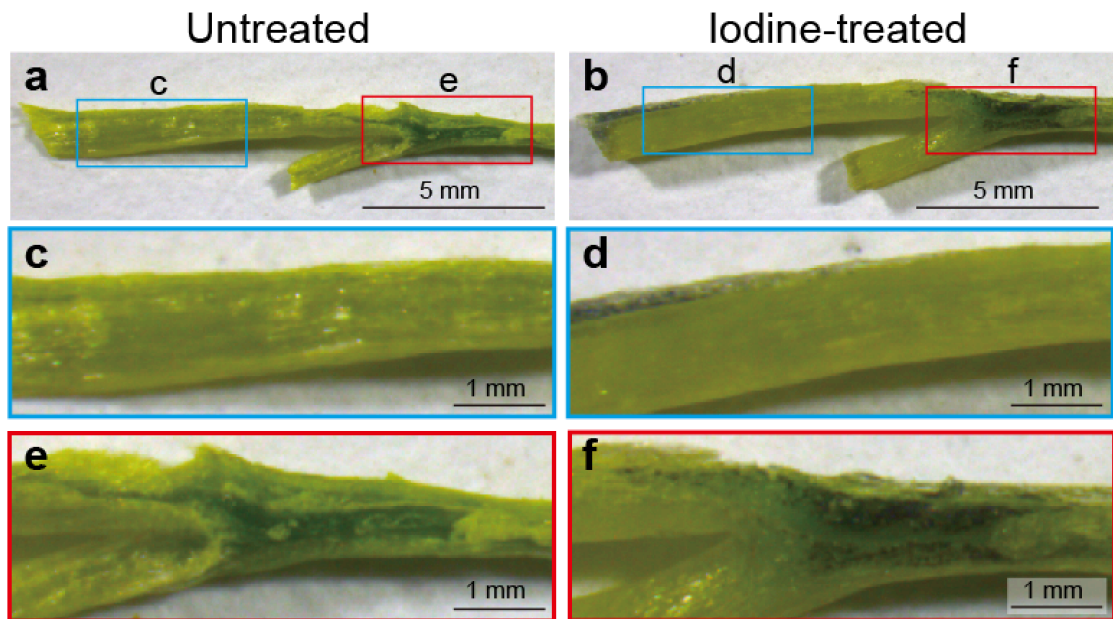

**Fig. S3** Distribution of starch in the shoot (a, c, and e) Sagittal section of the shoot and branching point. In (b, d, and f), starch was detected as blue-black colour upon staining with Lugol's iodine solution.

## **Supplementary videos**

**Movie S1** Egg-laying behaviour of *Smicronyx madaranus* (left). Enlarged image around the weevil (right).

**Movie S2** Plant-boring behaviour of *Smicronyx madaranus* (left). Enlarged image around the weevil (right).

**Movie S3** A larva feeding the inside tissue at the mid stage of the gall.
